# Supplementary material
Source: HighWire-hosted journal article supplement (https://rmdopen.bmj.com/content/5/1/e000891)
Supplement: inline-supplementary-material-1 [file inline-supplementary-material-1.docx]

**Supplementary Material**

Data that summarizes the per class and average accuracies achieved by training a classifier on information extracted from each mixed layer of the Inception-v3 architecture.

**Table 1: Accuracy of the Inception-v3 mixed layers**

|  | | **Doppler US OESS score** | | | | **Accuracy** |
| --- | --- | --- | --- | --- | --- | --- |
| **0** | **1** | **2** | **3** |
| **Mixed layer** | **0** | 72.7% | 50.0% | 65.9% | 75.0% | 65.9% |
| **1** | 79.5% | 40.9% | 59.1% | + 88.6% | 67.1% |
| **2** | 75.0% | 52.3% | 59.1% | 84.1% | 67.6% |
| **3** | 84.1% | 56.8% | 43.2% | + 88.6% | 68.2% |
| **4** | 79.5% | 59.1% | 68.2% | 75.0% | * 70.5% |
| **5** | 75.0% | 63.6% | 50.0% | 86.4% | 68.8% |
| **6** | 75.0% | + 75.0% | 59.1% | 63.6% | 68.2% |
| **7** | 75.0% | 56.8% | + 75.0% | 68.2% | 68.2% |
| **8** | 72.7% | 61.4% | 52.3% | 77.3% | 65.9% |
| **9** | 72.7% | +75.0% | 54.5% | 70.5% | 68.2% |
| **10** | 75.0% | 70.5% | 63.6% | 61.4% | 69.3% |

Per class and average accuracies achieved by classifiers trained on information extracted from each of the mixed layers in the Inception-v3 architecture. + = highest accuracy for each OESS score. * = highest average accuracy across all four scores.
